# Supplementary material
Source: PubMed Central journal article supplement (PMC4083855)

Mean response time (seconds)

3.00  
2.50  
2.00  
1.50  
1.00  
.50

-4.00

-2.00

.00

2.00

4.00

$r^2 = .33$

BOLD response (z-score)

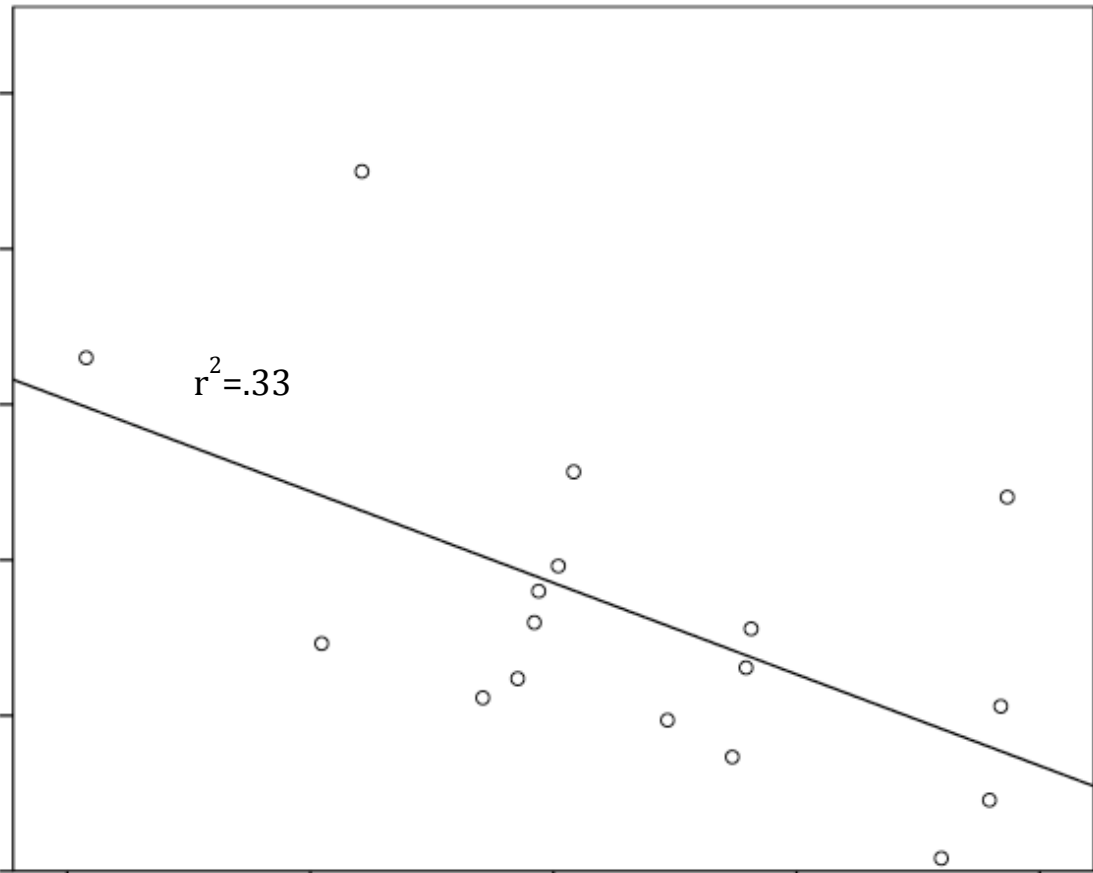

Supplement: NIHMS514802-supplement-01.pdf [file NIHMS514802-supplement-01.pdf]
